# Supplementary material
Source: PubMed Central journal article supplement (PMC2148417)

**A**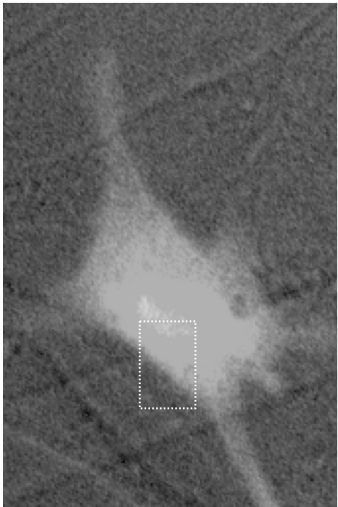**B**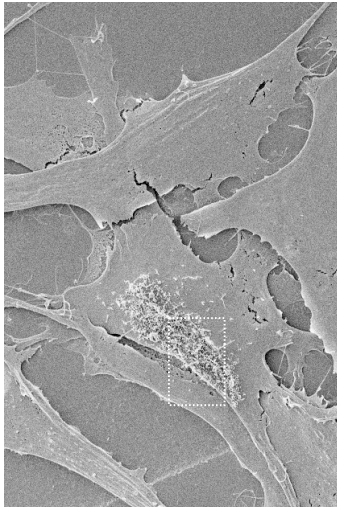**C**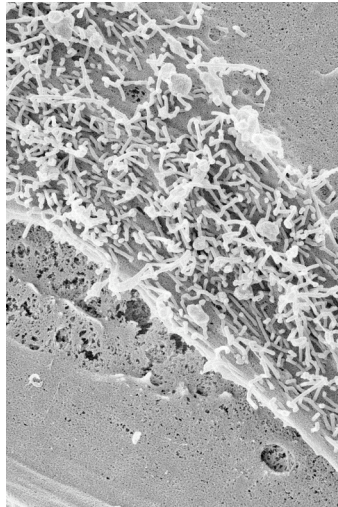

Supplement: pnas_0708002104_1.pdf [file pnas_0708002104_1.pdf]
